# Supplementary material
Source: PubMed Central journal article supplement (PMC7655414)
Supplement: 18-00652.pdf [file 18-00652.pdf]

## ON-LINE APPENDIX

### Local Feature Extraction

Gaussian curvature,  $K$ ,<sup>24</sup> is an extrinsic measure defined as the product of the 2 principal curvatures at each point in the 3D ROI. It quantifies the rate of deviation between one surface and another and is invariant under distance-preserving changes. The mean curvature  $H$  is an intrinsic measure of curvature that concerns the differential relationship between different points on the surface.<sup>24</sup> It is defined as the mean of the 2 principal curvatures. A total of 4 surface measures are derived from Gaussian and mean curvatures. The first one is a measure of curvature degree, also called curvedness ( $C$ ), which captures flat regions in the surface with low curvedness values and regions of sharp curvature having high curvedness. The second is a measure of sharpness degree ( $S$ ), which measures the sharpness of the curvature by relating the mean curvature  $H$  to the actual surface. The third measure is the shape index ( $SI$ ), a number ranging from  $-1$  to  $1$  that provides a continuous gradation between shapes. It is sensitive to subtle changes in surface shape, particularly in regions where total curvature is very low. For instance, hollow structures have a shape

index of  $<0$ , and inflections and bumps have a shape index of  $>0$ . Finally, a measure of the total curvature ( $K_T$ ) was computed to obtain the absolute value of the total curvature at each surface voxel.

The 2 principal curvatures for each point on the surface are the following:

$$P_1 = H + \sqrt{H^2 - K},$$

$$P_2 = H - \sqrt{H^2 - K}.$$

The 4 local measures derived from mean and Gaussian curvatures in this work are the following:

$$\text{Curvedness } C = \frac{\sqrt{P_1^2 + P_2^2}}{2},$$

$$\text{Sharpness } S = (P_1 - P_2)^2,$$

$$\text{Shape index } SI = \frac{2}{\pi} \times \arctan\left(\frac{P_1 + P_2}{P_1 - P_2}\right),$$

$$\text{Total curvature } K_T = |P_1| + |P_2|.$$

**On-line Table: Description of the 14 global features extracted from enhancing lesion and T2WI/FLAIR hyperintense perilesional compartments**

| Feature Name                 | Description                                                                                                                            |
|------------------------------|----------------------------------------------------------------------------------------------------------------------------------------|
| Volume                       | No. of voxels that compose the shape                                                                                                   |
| Integrated intensity         | Sum of the intensity values within the labels of the shape                                                                             |
| Elongation shape factor      | Square root ratio of the 2 second moments (largest eigenvalues of second-order moments covariance matrix)                              |
| Eccentricity                 | A number that uniquely characterizes the shape of the object (eg, a circle has 0 eccentricity; an ellipse has a value between 0 and 1) |
| Major axis                   | The longest diameter of the shape                                                                                                      |
| Minor axis                   | The shortest diameter of the shape                                                                                                     |
| Elongation                   | Fraction of major and minor axes                                                                                                       |
| Orientation                  | The shape orientation angle measured in radians (the angle that is formed between the x-axis and the major axis of the object)         |
| Perimeter                    | The distance around the outside edge of the object                                                                                     |
| Roundness                    | Measure of how the shape is close to a sphere (sphere has a roundness value of 1)                                                      |
| Equivalent spheric radius    | Radius of a sphere of an equivalent volume to the shape                                                                                |
| Equivalent spheric perimeter | The volume of the sphere that has a radius of the equivalent spheric radius (sphere that is equivalent to the shape)                   |
| Flatness                     | Ratio of first and second moments                                                                                                      |
| Tumor compactness            | Ratio between the volume and the surface area of the shape                                                                             |

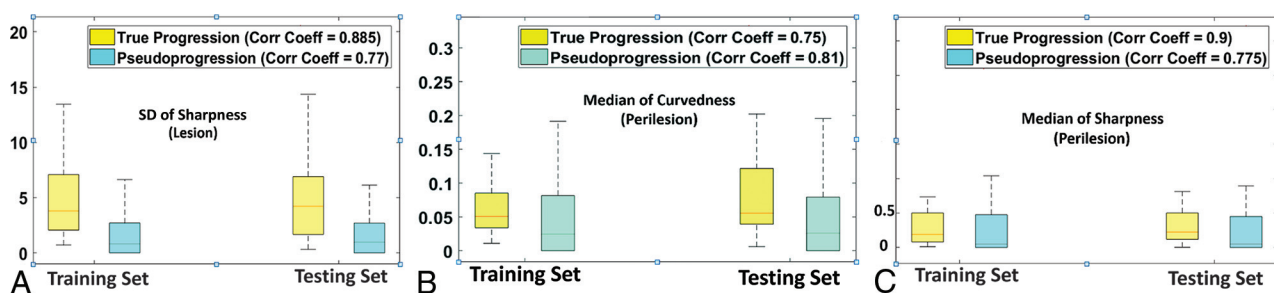

**ON-LINE FIGURE.** Boxplots for 3 top features (A, B, C) of the enhancing lesion and T2WI/FLAIR hyperintense perilesional areas for true progression and pseudoprogession cases across the training and testing sets. The boxplots and the reported coefficients reflect consistency in segmentations across the 2 sites as well as the stability of the extracted shape features. Corr Coeff indicates correlation coefficient.
